# Supplementary material for: Impact of particle size separation on the stabilisation efficiency of heavy-metal-contaminated soil: a meta-analysis
Source: Royal Society of Chemistry journal article supplement (doi:10.1039/d4em00308j), 2024-01-01
Supplement: d4em00308j1.pdf [file d4em00308j1.pdf]

## Supplementary Material

### Supplementary material 1. Papers selected in this meta-analysis

- Yan, Y., Qi, F., Zhao, S., Luo, Y., Gu, S., Li, Q., Zhang, L., Zhou, S., Bolan, N. (2019) A new low-cost hydroxyapatite for efficient immobilization of lead. *Journal of Colloid and Interface Science*, 553, 798-804.
- Li, H., Li, Z., Xie, S., Huang, Y., Chen, M., Xie, T., Wang, G. (2022) Accumulation and distribution of zinc in rice plants (*Oryza sativa* L.) growing in zinc contaminated paddy soils with biochar. *Journal of Environmental Chemical Engineering*, 10(1), 106811.
- Li, N., Fu, Q., Guo, B., Liu, C., Li, H., Ding, Y. (2019) Adsorption of  $Pb^{2+}$  by ameliorated alum plasma in water and soil. *PLOS ONE*, 14(1), e210614.
- Turan, V., Ramzani, P. M. A., Ali, Q., Abbas, F., Iqbal, M., Irum, A., Khan, W. (2017) Alleviation of nickel toxicity and an improvement in zinc bioavailability in sunflower seed with chitosan and biochar application in pH adjusted nickel contaminated soil. *Archives of Agronomy and Soil Science*, 64(8), 1053-1067.
- Ok, Y. S., Kim, S., Kim, D., Skousen, J. G., Lee, J., Cheong, Y., Kim, S., Yang, J. E. (2011) Ameliorants to immobilize Cd in rice paddy soils contaminated by abandoned metal mines in Korea. *Environmental Geochemistry and Health*, 33(S1): 23-30.
- Choi, J., Shin, W. S. (2020) Application of aqueous carbonated slags in the immobilization of heavy metals in field-contaminated soils. *Environmental Engineering Research*, 25(3), 356-365.
- Campos, P., Knicker, H., López, R., De la Rosa, J. M. (2021) Application of Biochar Produced from Crop Residues on Trace Elements Contaminated Soils: Effects on Soil Properties, Enzymatic Activities and *Brassica rapa* Growth. *Agronomy*, 11(7), 1394.
- Ok, Y. S., Lee, S. S., Jeon, W., Oh, S., Usman, A. R. A., Moon, D. H. (2011) Application of eggshell waste for the immobilization of cadmium and lead in a contaminated soil. *Environmental Geochemistry and Health*, 33(S1), 31-39.
- Yuan, Y., Chai, L., Yang, Z., Liao, Y., Deng, X., Zhang, S. (2013) Application of polymeric aluminum salts in remediation of soil contaminated by Pb, Cd, Cu, and Zn. *Journal of Central South University*, 20(6), 1638-1644.
- Vasarevičius, S., Danila, V., Paliulis, D. (2019) Application of Stabilized Nano Zero Valent Iron Particles for Immobilization of Available  $Cd^{2+}$ ,  $Cu^{2+}$ ,  $Ni^{2+}$ , and  $Pb^{2+}$  Ions in Soil. *International Journal of Environmental Research*, 13(3), 465-474.
- Li, P., Yu, J., Huangfu, Z., Chang, J., Zhong, C., Ding, P. (2020) Applying modified biochar with nZVI/nFe<sub>3</sub>O<sub>4</sub> to immobilize Pb in contaminated soil. *Environmental Science and Pollution Research*, 27(19), 24495-24506.
- Mitzia, A., Vitková, M., Komárek, M. (2020). Assessment of biochar and/or nano zero-valent iron for the stabilisation of Zn, Pb and Cd: A temporal study of solid phase geochemistry under changing soil conditions. *Chemosphere*, 242, 125248.
- Bade, R., Oh, S., Sik Shin, W. (2012) Assessment of metal bioavailability in smelter-contaminated soil before and after lime amendment. *Ecotoxicology and Environmental Safety*, 80, 299-307.
- Sun, Y., Sun, G., Xu, Y., Wang, L., Liang, X., Lin, D., Hu, F. (2013) Assessment of natural

- sepiolite on cadmium stabilization, microbial communities, and enzyme activities in acidic soil. *Environmental Science and Pollution Research*, 20(5), 3290-3299.
- Zhang, W., Yang, J., Li, Z., Zhou, D., Dang, F. (2017) Assessment of the availability of As and Pb in soils after in situ stabilization. *Environmental Science and Pollution Research*, 24(29), 23153-23160.
- Abad-Valle, P., Álvarez-Ayuso, E., Murciego, A., Pellitero, E. (2016) Assessment of the use of sepiolite amendment to restore heavy metal polluted mine soil. *Geoderma*, 280, 57-66.
- Yang, L., Liu, B., Lu, Y., Lu, F., Wu, X., You, W., Huang, B. (2020) Bioavailability of cadmium to celery (*Apium graveolens* L.) grown in acidic and Cd-contaminated greenhouse soil as affected by the application of hydroxyapatite with different particle sizes. *Chemosphere*, 240, 124916.
- Yang, X., Lu, K., McGrouther, K., Che, L., Hu, G., Wang, Q., Liu, X., Shen, L., Huang, H., Ye, Z., Wang, H. (2017) Bioavailability of Cd and Zn in soils treated with biochars derived from tobacco stalk and dead pigs. *Journal of Soils and Sediments*, 17(3), 751-762.
- Houssou, A. A., Jeyakumar, P., Niazi, N. K., Van Zwieten, L., Li, X., Huang, L., Wei, L., Zheng, X., Huang, Q., Huang, Y., Huang, X., Wang, H., Liu, Z., Huang, Z. (2022) Biochar and soil properties limit the phytoavailability of lead and cadmium by *Brassica chinensis* L. in contaminated soils. *Biochar*, 4(1).
- Li, J., Zhang, S., Ding, X. (2022) Biochar combined with phosphate fertilizer application reduces soil cadmium availability and cadmium uptake of maize in Cd-contaminated soils. *Environmental Science and Pollution Research*, 29(17), 25925-25938.
- Herath, I., Iqbal, M. C. M., Al-Wabel, M. I., Abduljabbar, A., Ahmad, M., Usman, A. R. A., Sik Ok, Y., Vithanage, M. (2017) Bioenergy-derived waste biochar for reducing mobility, bioavailability, and phytotoxicity of chromium in anthropized tannery soil. *Journal of Soils and Sediments*, 17(3), 731-740.
- Azeem, M., Ali, A., Arockiam Jeyasundar, P. G. S., Li, Y., Abdelrahman, H., Latif, A., Li, R., Basta, N., Li, G., Shaheen, S. M., Rinklebe, J., Zhang, Z. (2021) Bone-derived biochar improved soil quality and reduced Cd and Zn phytoavailability in a multi-metal contaminated mining soil. *Environmental Pollution*, 277, 116800.
- Bashir, S., Rizwan, M. S., Salam, A., Fu, Q., Zhu, J., Shaaban, M., Hu, H. (2018) Cadmium Immobilization Potential of Rice Straw-Derived Biochar, Zeolite and Rock Phosphate: Extraction Techniques and Adsorption Mechanism. *Bulletin of Environmental Contamination and Toxicology*, 100(5), 727-732.
- Puga, A. P., Abreu, C. A., Melo, L. C. A., Paz-Ferreiro, J., Beesley, L. (2015) Cadmium, lead, and zinc mobility and plant uptake in a mine soil amended with sugarcane straw biochar. *Environmental Science and Pollution Research*, 22(22), 17606-17614.
- Remonsellez, F., Zarrias, N., Bol, R., Fuentes, B. (2017) Characterization and low-cost treatment of an industrial arid soil polluted with lead sulfide in northern Chile. *Environmental Earth Sciences*, 76(7).
- Jiang, K., Zhou, K. (2018) Chemical immobilization of lead, cadmium, and arsenic in a smelter-contaminated soil using 2,4,6-trimercaptotriazine, trisodium salt, nonahydrate and ferric sulfate. *Journal of Soils and Sediments*, 18(3), 1060-1065.
- Valipour, M., Shahbazi, K., Khanmirzaei, A. (2016) Chemical Immobilization of Lead, Cadmium, Copper, and Nickel in Contaminated Soils by Phosphate Amendments. *CLEAN–Soil, Air,*

Water, 44 (5), 572–8.

- Huang, G., Su, X., Rizwan, M. S., Zhu, Y., Hu, H. (2016) Chemical immobilization of Pb, Cu, and Cd by phosphate materials and calcium carbonate in contaminated soils. *Environmental Science and Pollution Research*, 223(16), 16845-16856.
- Saffari, M. (2018). Chemical stabilization of some heavy metals in an artificially multi-elements contaminated soil, using rice husk biochar and coal fly ash. *Pollution*, 4(4), 547-562.
- Ren, J., Wang, F., Zhai, Y., Zhu, Y., Peng, C., Wang, T., Li, C., Zeng, G. (2017) Effect of sewage sludge hydrochar on soil properties and Cd immobilization in a contaminated soil. *Chemosphere*, 189, 627-633.
- Tanzeem-ul-Haq, H. S., Rasool, B., Ehtisham-ul-Haque, S., Saif, S., Zafar, S., Younis, T., Akhtar, I., Jafri, L., Iqbal, N., Masood, N., Lewińska, K., Iqbal, M. (2021) Chitosan with Bentonite and Biochar in Ni-Affected Soil Reduces Grain Ni Concentrations, Improves Soil Enzymes and Grain Quality in Lentil. *Minerals*, 11(1), 11.
- Hu, X., Yuan, X., Dong, L. Coal fly ash and straw immobilize Cu, Cd and Zn from mining wasteland. *Environmental Chemistry Letters*, 12(2), 289-295.
- Mehmood, S., Rizwan, M., Bashir, S., Ditta, A., Aziz, O., Yong, L. Z., Dai, Z., Akmal, M., Ahmed, W., Adeel, M., Imtiaz, M., Tu, S. (2018) Comparative Effects of Biochar, Slag and Ferrous–Mn Ore on Lead and Cadmium Immobilization in Soil. *Bulletin of Environmental Contamination and Toxicology*, 100(2), 286-292.
- Feng, Y., Du, Y., Reddy, K. R., Xia, W. (2018) Performance of two novel binders to stabilize field soil with zinc and chloride: Mechanical properties, leachability and mechanisms assessment. *Construction and Building Materials*, 189, 1191-1199.
- Cui, H., Shen, L., Yang, X., Zhang, S., Yi, Q., Meng, L., Zheng, X., Wang, Q., Zhou, J. (2020) Effects of hematite on the stabilization of copper, cadmium and phosphorus in a contaminated red soil amended with hydroxyapatite. *Ecotoxicology and Environmental Safety*, 201, 110830.
- Zhou, Y., Li, L. (2021) Effect of a Passivator Synthesized by Wastes of Iron Tailings and Biomass on the Leachability of Cd/Pb and Safety of Pak Choi (*Brassica chinensis* L.) in Contaminated Soil. *Processes*, 9(11), 1866.
- Kim, H., Kim, K., Kim, H., Yoon, J., Yang, J. E., Ok, Y. S., Owens, G., Kim, K. (2015) Effect of biochar on heavy metal immobilization and uptake by lettuce (*Lactuca sativa* L.) in agricultural soil. *Environmental Earth Sciences*, 74(2), 1249-1259.
- Zheng, R., Chen, Z., Cai, C., Wang, X., Huang, Y., Xiao, B., Sun, G. (2013) Effect of Biochars from Rice Husk, Bran, and Straw on Heavy Metal Uptake by Pot-Grown Wheat Seedling in a Historically Contaminated Soil. *Bioresources*, 8(4).
- Yoon, D., Choi, W. S., Hong, Y. K., Lee, Y. B., Kim, S. C. (2019) Effect of chemical amendments on reduction of bioavailable heavy metals and ecotoxicity in soil. *Applied Biological Chemistry*, 62(1).
- Jiang, L., Yi, X., Xu, B., Lai, K. (2020) Effect of wheat straw derived biochar on immobilization of Cd and Pb in single- and binary-metal contaminated soil. *Human and ecological risk assessment*, 26(9), 2420-2433.
- Li, S., Sun, X., Li, S., Liu, Y., Ma, Q., Zhou, W. (2021) Effects of amendments on the bioavailability, transformation and accumulation of heavy metals by pakchoi cabbage in a multi-element contaminated soil. *RSC advances*, 11(8), 4395-4445.

- Dai, S., Li, H., Yang, Z., Dai, M., Dong, X., Ge, X., Sun, M., Shi, L. (2018) Effects of biochar amendments on speciation and bioavailability of heavy metals in coal-mine-contaminated soil. *Human and ecological risk assessment*, 24(7), 1887-1900.
- Woldetsadik, D., Drechsel, P., Keraita, B., Marschner, B., Itanna, F., Gebrekidan, H. (2016) Effects of biochar and alkaline amendments on cadmium immobilization, selected nutrient and cadmium concentrations of lettuce (*Lactuca sativa*) in two contrasting soils. *SpringerPlus*, 5(1).
- Cui, H., Yang, X., Xu, L., Fan, Y., Yi, Q., Li, R., Zhou, J. (2017) Effects of goethite on the fractions of Cu, Cd, Pb, P and soil enzyme activity with hydroxyapatite in heavy metal-contaminated soil. *RSC Adv*, 7(72), 45869-45877.
- Gao, X., Peng, Y., Zhou, Y., Adeel, M., Chen, Q. (2019) Effects of magnesium ferrite biochar on the cadmium passivation in acidic soil and bioavailability for pakchoi (*Brassica chinensis* L.). *Journal of Environmental Management*, 251, 109610.
- Liu, L., Luo, D., Wei, L., Liu, Y., Huang, S., Huang, L., Xie, Z., Xiao, T., Huang, X., Wu, Q. (2020) Effects of metal stabilizers on soil hydraulic characteristics and mobility of cadmium. *Environmental Science and Pollution Research*, 27(27), 33712-33722.
- Ok, Y. S., Oh, S., Ahmad, M., Hyun, S., Kim, K., Moon, D. H., Lee, S. S., Lim, K. J., Jeon, W., Yang, J. E. (2010) Effects of natural and calcined oyster shells on Cd and Pb immobilization in contaminated soils. *Environmental Earth Sciences*, 61(6), 1301-1308.
- Lim, J. E., Ahmad, M., Usman, A. R. A., Lee, S. S., Jeon, W., Oh, S., Yang, J. E., Ok, Y. S. (2013) Effects of natural and calcined poultry waste on Cd, Pb and As mobility in contaminated soil. *Environmental Earth Sciences*, 69(1), 11-20.
- Zhang, D., Ding, A. (2019) Effects of Passivating Agents on the Availability of Cd and Pb and Microbial Community Function in a Contaminated Acidic Soil. *Bulletin of Environmental Contamination and Toxicology*, 103(1), 98-105.
- Yang, J., Wang, L., Li, J., Wei, D., Chen, S., Guo, Q., Ma, Y. (2015). Effects of rape straw and red mud on extractability and bioavailability of cadmium in a calcareous soil. *Frontiers of environmental science & engineering*, 9, 419-428.
- Kim, M., Min, H., Kim, J., Lee, S. (2019) Estimating Arsenic Mobility and Phytotoxicity Using Two Different Phosphorous Fertilizer Release Rates in Soil. *Agronomy*, 9(3), 111.
- Aslam, Z., Khalid, M., Naveed, M., Shahid, M. (2017). Evaluation of green waste and popular twigs biochar produced at different pyrolysis temperatures for remediation of heavy metals contaminated soil. *International Journal of Agriculture and Biology*, 19(6), 1427-1436.
- Ahn, J., Kang, S., Hwang, K., Kim, H., Kim, J., Song, H., Hwang, I. (2015) Evaluation of phosphate fertilizers and red mud in reducing plant availability of Cd, Pb, and Zn in mine tailings. *Environmental Earth Sciences*, 74(3), 2659-2668.
- Chavez, E., He, Z. L., Stoffella, P. J., Mylavarapu, R., Li, Y., Baligar, V. C. Evaluation of soil amendments as a remediation alternative for cadmium-contaminated soils under cacao plantations. *Environmental Science and Pollution Research*, 23(17), 17571-17580.
- Wang, Y., Li, R., Liu, W., Cheng, L., Jiang, Q., Zhang, Y. (2019) Exploratory of immobilization remediation of hydroxyapatite (HAP) on lead-contaminated soils. *Environmental Science and Pollution Research*, 26(26), 26674-26684.
- Fan, Y., Wu, Q., Bao, B., Cao, Y., Zhang, S., Cui, H. (2021) Ferrihydrite reduces the

- bioavailability of copper and cadmium and phosphorus release risk in hydroxyapatite amended soil. *Journal of Environmental Chemical Engineering*, 9(6), 106756.
- Zhu, Q., Huang, D., Liu, S., Zhou, B., Luo, Z., Zhu, H. (2012) Flooding-enhanced immobilization effect of sepiolite on cadmium in paddy soil. *Journal of Soils and Sediments*, 12(2), 169-177.
- Anemana, T., Óvári, M., Varga, M., Mihály, J., Uzinger, N., Rékási, M., Yao, J., Tatár, E., Strelci, C., Záray, G. and Mihucz, V.G., (2019) Granular activated charcoal from peanut (*Arachis hypogea*) shell as a new candidate for stabilization of arsenic in soil. *Microchemical Journal*, 149, 104030.
- Wang, L., Li, X., Tsang, D. C. W., Jin, F., Hou, D. (2020) Green remediation of Cd and Hg contaminated soil using humic acid modified montmorillonite: Immobilization performance under accelerated ageing conditions. *Journal of Hazardous Materials*, 387, 122005.
- Mahmoud, E. K. (2011) Heavy metal reductions in soils amended with compost and water treatment residuals. *Compost Science & Utilization*, 19(1), 69-73.
- Song, Z., Zhang, Z., Luo, C., Yang, L., Wu, J. (2022) High-efficiency stabilization of lead in contaminated soil by thermal-organic acid-activated phosphate rock. *Environmental Science and Pollution Research*, 29(32), 49116-49125.
- Vasarevičius, S., Danila, V., Januševičius, T. (2020) Immobilisation of Cadmium, Copper, Lead, and Nickel in Soil Using Nano Zerovalent Iron Particles: Ageing Effect on Heavy Metal Retention. *Water, Air, & Soil Pollution*, 231(10).
- He, L., Xu, Y., Huang, Q., Liang, X. (2021) Immobilization of Cadmium in Neutral Soil in a Vegetable Cultivation Mode Using Thiolated Palygorskite. *CLEAN – Soil, Air, Water*, 49(2).
- Negim, O., Sweed, A. Immobilization of heavy metals from the contaminated soil using application of sugarcane organic wastes by-products. *Egyptian Journal of Soil Science*, 60(2), 145-155.
- Abbaspour, A., Golchin, A. (2011) Immobilization of heavy metals in a contaminated soil in Iran using di-ammonium phosphate, vermicompost and zeolite. *Environmental Earth Sciences*, 63(5), 935-943.
- Li, J., Wang, Q., Chen, Z., Xue, Q., Chen, X., Mu, Y., Poon, C. S. (2021) Immobilization of high-Pb contaminated soil by oxalic acid activated incinerated sewage sludge ash. *Environmental Pollution*, 284, 117120.
- Liu, Y., Yan, Y., Seshadri, B., Qi, F., Xu, Y., Bolan, N., Zheng, F., Sun, X., Han, W., Wang, L. (2018) Immobilization of lead and copper in aqueous solution and soil using hydroxyapatite derived from flue gas desulphurization gypsum. *Journal of Geochemical Exploration*, 184, 239-246.
- Ahmad, M., Hashimoto, Y., Moon, D. H., Lee, S. S., Ok, Y. S. (2012) Immobilization of lead in a Korean military shooting range soil using eggshell waste: An integrated mechanistic approach. *Journal of Hazardous Materials*, 209-210, 392-401.
- Rizwan, M. S., Imtiaz, M., Huang, G., Chhajro, M. A., Liu, Y., Fu, Q., Zhu, J., Ashraf, M., Zafar, M., Bashir, S., Hu, H. (2016) Immobilization of Pb and Cu in polluted soil by superphosphate, multi-walled carbon nanotube, rice straw and its derived biochar. *Environmental Science and Pollution Research*, 23(15), 15532-15543.

- Tica, D., Udovic, M., Lestan, D. (2011) Immobilization of potentially toxic metals using different soil amendments. *Chemosphere*, 2011, 85(4), 577-583.
- Lim, J. E., Sung, J. K., Sarkar, B., Wang, H., Hashimoto, Y., Tsang, D. C. W., Ok, Y. S. (2017) Impact of natural and calcined starfish (*Asterina pectinifera*) on the stabilization of Pb, Zn and As in contaminated agricultural soil. *Environmental Geochemistry and Health*, 39(2), 431-441.
- Fu, P., Yang, H., Zhang, G., Fu, P., Li, Z. (2019) In-Situ Immobilization of Cd-Contaminated Soils Using Ferronickel Slag as Potential Soil Amendment. *Bulletin of Environmental Contamination and Toxicology*, 103(5): 756-762.
- Sun, Y., Wang, R., Li, Y., Xu, Y., Wang, L., Liang, X., Liu, W. (2015) In situ immobilisation remediation of cadmium in artificially contaminated soil: a chemical and ecotoxicological evaluation. *Chemistry and ecology*, 31(7), 594-606.
- Sun, Y., Sun, G., Xu, Y., Wang, L., Lin, D., Liang, X., Shi, X. (2012) In situ stabilization remediation of cadmium contaminated soils of wastewater irrigation region using sepiolite. *J Environ Sci (China)*, 24(10), 1799-1805.
- Ultra, V., Nunez, J., Lee, S. (2016) Influence of charcoal-based soil amendments on growth and nutrient uptake of rice (*Oryza sativa*) in Cadmium contaminated soil. *Emirates Journal of Food and Agriculture*, 28(12), 872.
- Rizwan, M. S., Imtiaz, M., Chhajro, M. A., Huang, G., Fu, Q., Zhu, J., Aziz, O., Hu, H. (2016) Influence of pyrolytic and non-pyrolytic rice and castor straws on the immobilization of Pb and Cu in contaminated soil. *Environ Technol*, 37(21), 2679-2686.
- Szrek, D., Bajda, T., Manecki, M. (2011) A comparative study of the most effective amendment for Pb, Zn and Cd immobilization in contaminated soils. *Journal of Environmental Science and Health, Part A*, 46(13), 1491-1502.
- Chang, Y. T., Hsi, H. C., Hseu, Z. Y., Jheng, S. L. (2013) Chemical stabilization of cadmium in acidic soil using alkaline agronomic and industrial by-products. *Journal of Environmental Science and Health, Part A*, 48(13), 1748-1756.
- Azhar, A. T. S., Azim, M. A. M., Aziman, M., Nabila, A. T. A. (2016) Leachability of Arsenic (As) Contaminated Landfill Soil Stabilised by Cement and Bagasse Ash. *IOP conference series. Materials Science and Engineering*, 160(1), 12078.
- Liang, X., Qin, X., Huang, Q., Huang, R., Yin, X., Wang, L., Sun, Y., Xu, Y. (2017) Mercapto functionalized sepiolite: a novel and efficient immobilization agent for cadmium polluted soil. *RSC advances*, 7(63), 39955-39961.
- Wang, Y., Wang, L., Li, Z., Yang, D., Xu, J., Liu, X. (2021) MgO-laden biochar enhances the immobilization of Cd/Pb in aqueous solution and contaminated soil. *Biochar*, 3(2), 175-188.
- Almaroai, Y. A., Vithanage, M., Rajapaksha, A. U., Lee, S. S., Dou, X., Lee, Y. H., Sung, J., Ok, Y. S. (2014) Natural and synthesised iron-rich amendments for As and Pb immobilisation in agricultural soil. *Chemistry and ecology*, 30(3), 267-279.
- Zhao, S., Cai, X., Wang, J., Li, D., Zhao, S., Yu, X., Xu, D., Zhang, S. (2021) Three types of passivators on the stabilization of exogenous lead-contaminated soil with different particle sizes. *Scientific Reports*, 11(1).
- Liu, Y., Fan, R., Liu, S., He, H. (2022) Oxalic acid activated bone meal for immobilization of Pb and Cd contaminated soils. *Environmental Science and Pollution Research*, 29(24),

36281-36294.

- Torres-Quiroz, C., Dissanayake, J., Park, J. (2021) Oyster Shell Powder, Zeolite and Red Mud as Binders for Immobilising Toxic Metals in Fine Granular Contaminated Soils (from Industrial Zones in South Korea). *International Journal of Environmental Research and Public Health*, 18(5), 2530.
- Netherway, P., Reichman, S. M., Laidlaw, M., Scheckel, K., Pingitore, N., Gascó, G., Méndez, A., Surapaneni, A., Paz Ferreira, J. (2019) Phosphorus-Rich Biochars Can Transform Lead in an Urban Contaminated Soil. *Journal of Environmental Quality*, 48(4), 1091-1099.
- Awad, Y. M., Vithanage, M., Niazi, N. K., Rizwan, M., Rinklebe, J., Yang, J. E., Ok, Y. S., Lee, S. S. (2019) Potential toxicity of trace elements and nanomaterials to Chinese cabbage in arsenic- and lead-contaminated soil amended with biochars. *Environmental Geochemistry and Health*, 41(4), 1777-1791.
- Yi, N., Wu, Y., Fan, L., Hu, S. (2019) Remediating Cd-Contaminated Soils Using Natural and Chitosan-Introduced Zeolite, Bentonite, and Activated Carbon. *Polish Journal of Environmental Studies*, 28(3), 1461-1468.
- Wang, B., Wang, C., Li, J., Sun, H., Xu, Z. (2014) Remediation of alkaline soil with heavy metal contamination using tourmaline as a novel amendment. *Journal of Environmental Chemical Engineering*, 2(3), 1281-1286.
- Lim, J.E., Ahmad, M., Lee, S.S., Shope, C.L., Hashimoto, Y., Kim, K.R., Usman, A.R., Yang, J.E. and Ok, Y.S. (2013) Effects of lime-based waste materials on immobilization and phytoavailability of cadmium and lead in contaminated soil. *Clean–Soil, Air, Water*, 41(12), 1235-1241.
- Chen, M., Liu, Y., Zhang, D., Zhu, J., Chen, X., Yuan, L. (2022) Remediation of arsenic-contaminated paddy soil by iron oxyhydroxide and iron oxyhydroxide sulfate-modified coal gangue under flooded condition. *Science of The Total Environment*, 804, 150199.
- Zhou, S., Liu, Z., Sun, G., Zhang, Q., Cao, M., Tu, S., Xiong, S. (2022) Simultaneous reduction in cadmium and arsenic accumulation in rice (*Oryza sativa* L.) by iron/iron-manganese modified sepiolite. *Science of The Total Environment*, 810, 152189.
- Zhang, Z., Guo, G., Teng, Y., Wang, J., Rhee, J. S., Wang, S., Li, F. (2015) Screening and assessment of solidification/stabilization amendments suitable for soils of lead-acid battery contaminated site. *Journal of hazardous materials*, 288, 140-146.
- Yuan, Y., Chai, L., Yang, Z., Yang, W. (2017) Simultaneous immobilization of lead, cadmium, and arsenic in combined contaminated soil with iron hydroxyl phosphate. *Journal of Soils and Sediments*, 17(2), 432-439.
- Hou, R., Wang, L., Shen, Z., Alessi, D. S., Hou, D. (2021) Simultaneous reduction and immobilization of Cr(VI) in seasonally frozen areas: Remediation mechanisms and the role of ageing. *Journal of Hazardous Materials*, 415, 125650.
- Moon, D. H., Wazne, M., Cheong, K. H., Chang, Y., Baek, K., Ok, Y. S., Park, J. (2015) Stabilization of As-, Pb-, and Cu-contaminated soil using calcined oyster shells and steel slag. *Environmental Science and Pollution Research*, 22(14), 11162-11169.
- Fang, S., Tsang, D. C. W., Zhou, F., Zhang, W., Qiu, R. (2016) Stabilization of cationic and anionic metal species in contaminated soils using sludge-derived biochar. *Chemosphere*, 149, 263-271.
- Wang, Y., Li, F., Song, J., Xiao, R., Luo, L., Yang, Z., Chai, L. (2018) Stabilization of Cd-, Pb-,

- Cu- and Zn-contaminated calcareous agricultural soil using red mud: a field experiment. *Environmental Geochemistry and Health*, 40(5), 2143-2153.
- Saffari, M., Karimian, N., Ronaghi, A., Yasrebi, J., Ghasemi-Fasaei, R. (2016) Stabilization of lead as affected by various amendments and incubation time in a calcareous soil. *Archives of Agronomy and Soil Science*, 62(3), 317-337.
- Zhang, C., Zhong, Z., Sun, Y., Lao, H. (2014) Stabilization of Multiple Heavy Metal Contaminated Soils Using Biological Materials. *Applied Mechanics and Materials*, 541-542, 329-333.
- Ok, Y. S., Lim, J. E., Moon, D. H. (2011) Stabilization of Pb and Cd contaminated soils and soil quality improvements using waste oyster shells. *Environmental Geochemistry and Health*, 33(1), 83-91.
- Moon, D. H., Cheong, K. H., Khim, J., Wazne, M., Hyun, S., Park, J., Chang, Y., Ok, Y. S. (2013) Stabilization of Pb<sup>2+</sup> and Cu<sup>2+</sup> contaminated firing range soil using calcined oyster shells and waste cow bones. *Chemosphere*, 91(9), 1349-1354.
- Li, B., Li, C., Xiang, Z., Yan, H., Cao, Y., Gao, H. (2022) Studies on stabilization effect of calcium dihydrogen phosphate (Ca(H<sub>2</sub>PO<sub>4</sub>)<sub>2</sub>)-on Lead(Pb)-contaminated Soil. *International Journal of Phytoremediation*, 24(5), 456-462.
- Ye, S., Wang, L., Liu, T. (2022) Study of solidification and stabilization of heavy metals by passivators in heavy metal-contaminated soil. *Open Chemistry*, 20(1), 1-9.
- Wu, J., Dumat, C., Lu, H., Li, Y., Li, H., Xiao, Y., Zhuang, P., Li, Z. (2016) Synergistic improvement of crop physiological status by combination of cadmium immobilization and micronutrient fertilization. *Environmental Science and Pollution Research*, 23(7), 6661-6670.
- Pump, C., Keiblinger, K. M., Scheiblaue, E., Johnen, S., Lehto, N. J., Soja, G., Zehetner, F. (2019) Temporal Changes in the Efficiency of Biochar- and Compost-Based Amendments on Copper Immobilization in Vineyard Soils. *Soil Systems*, 3(4), 78.
- Shen, Z., Pan, S., Hou, D., O'Connor, D., Jin, F., Mo, L., Xu, D., Zhang, Z., Alessi, D. S. (2019) Temporal effect of MgO reactivity on the stabilization of lead contaminated soil. *Environment International*, 131, 104990.
- Radziemska, M., Beś, A., Gusiatin, Z. M., Cerdà, A., Mazur, Z., Jeznach, J., Kowal, P., Brtnický, M. (2019) The combined effect of phytostabilization and different amendments on remediation of soils from post-military areas. *Science of The Total Environment*, 688, 37-45.
- Li, H., Ye, X., Geng, Z., Zhou, H., Guo, X., Zhang, Y., Zhao, H., Wang, G. (2016) The influence of biochar type on long-term stabilization for Cd and Cu in contaminated paddy soils. *Journal of Hazardous Materials*, 304, 40-48.
- Hailegnaw, N. S., Mercl, F., Pračke, K., Praus, L., Száková, J., Tlustoš, P. (2020) The Role of Biochar and Soil Properties in Determining the Available Content of Al, Cu, Zn, Mn, and Cd in Soil. *Agronomy*, 10(6), 885.
- Rajapaksha, A. U., Ahmad, M., Vithanage, M., Kim, K., Chang, J. Y., Lee, S. S., Ok, Y. S. (2015) The role of biochar, natural iron oxides, and nanomaterials as soil amendments for immobilizing metals in shooting range soil. *Environmental Geochemistry and Health*, 37(6), 931-942.
- Jia, W., Wang, B., Wang, C., Sun, H. (2017) Tourmaline and biochar for the remediation of acid



soil polluted with heavy metals. Journal of environmental chemical engineering, 5(3), 2107-2114.

Zaman, A., Irfan, M., Khan, A. M., Ali, H., Iqbal, N., Ahmad, I., Fawad, M., Muhammad, F. (2022) Toxicity Assessment and Phytostabilization of Contaminated Soil by Using Wheat Straw-derived Biochar in Tomato Plants. *Gesunde Pflanzen*, 74(3), 705-713.

Oyeyiola, A. O., Adeosun, W., Fabunmi, I. A. (2017) Use of Agricultural Wastes for the Immobilization of Metals in Polluted Soils in Lagos State, Nigeria. *J Health Pollut*, 7(13), 56-64.

Moeen, M., Qi, T., Hussain, Z., Ge, Q., Maqbool, Z., Jianjie, X., Kaiqing, F. (2020) Use of Zeolite to Reduce the Bioavailability of Heavy Metals in a Contaminated Soil. *Journal of Ecological Engineering*, 21(7), 186-196.

Yin, D., Wang, X., Chen, C., Peng, B., Tan, C., Li, H. (2016) Varying effect of biochar on Cd, Pb and As mobility in a multi-metal contaminated paddy soil. *Chemosphere*, 152, 196-206.

Gil-Díaz, M., Álvarez, M. A., Alonso, J., Lobo, M. C. (2020) Effectiveness of nanoscale zero-valent iron for the immobilization of Cu and/or Ni in water and soil samples. *Scientific Reports*, 10(1).

Supplementary Table.S1-1 Heavy metal stabilisation efficiency of different material after different particle size separation

|             |              |              | Stabilisation efficiency (%) |           |                |              |         |       |
|-------------|--------------|--------------|------------------------------|-----------|----------------|--------------|---------|-------|
|             |              |              | Calcium salt                 | Phosphate | Organic matter | Clay mineral | Biochar | Other |
| As          | Size≤0.15mm  | 25% quantile |                              |           |                |              |         |       |
|             |              | Median       |                              |           |                |              |         |       |
|             |              | mean         |                              |           |                | 74.23        |         |       |
|             |              | 75% quantile |                              |           |                |              |         |       |
|             |              | n            |                              |           |                | 1            |         |       |
|             | Size0.15~2mm | 25% quantile |                              |           |                |              |         |       |
|             |              | Median       |                              |           |                |              |         |       |
|             |              | mean         |                              | 53.00     |                |              |         | 5.20  |
|             |              | 75% quantile |                              |           |                |              |         |       |
|             |              | n            |                              | 1         |                |              |         | 1     |
|             | Size≥2mm     | 25% quantile | 7.19                         |           | 19.47          | 13.95        | 16.01   | 32.14 |
|             |              | Median       | 12.37                        |           | 33.64          | 24.07        | 62.97   | 71.88 |
|             |              | mean         | 41.44                        |           | 51.44          | 31.06        | 54.02   | 60.77 |
|             |              | 75% quantile | 99.84                        |           | 92.32          | 42.27        | 86.06   | 87.02 |
|             |              | n            | 23                           |           | 5              | 20           | 14      | 12    |
| Size≤0.15mm | 25% quantile |              |                              |           | 43.11          |              |         |       |
|             | Median       |              |                              |           | 62.43          |              |         |       |
|             | mean         | 60.87        |                              |           | 58.38          |              |         |       |
|             | 75%          |              |                              |           | 71.94          |              |         |       |

|    |              |              |       |       |       |       |       |       |
|----|--------------|--------------|-------|-------|-------|-------|-------|-------|
|    |              | quantile     |       |       |       |       |       |       |
|    |              | n            | 1     |       |       | 6     |       |       |
|    | Size0.15~2mm | 25% quantile | 39.09 |       | 34.93 | 3.25  |       | 63.87 |
|    |              | Median       | 66.38 |       | 71.18 | 5.38  |       | 82.87 |
|    |              | mean         | 59.85 | 46.00 | 67.23 | 6.08  |       | 78.14 |
|    |              | 75% quantile | 79.35 |       | 100   | 9.61  |       | 90.05 |
|    |              | n            | 9     | 1     | 6     | 3     |       | 5     |
|    | Size≥2mm     | 25% quantile | 10.69 | 13.06 | 12.46 | 12.80 | 21.74 | 34.85 |
|    |              | Median       | 33.66 | 27.12 | 29.35 | 25.37 | 35.47 | 57.94 |
|    |              | mean         | 44.93 | 35.63 | 36.59 | 29.61 | 40.67 | 53.45 |
|    |              | 75% quantile | 83.33 | 60.56 | 54.04 | 43.35 | 59.11 | 82.55 |
| n  |              | 90           | 45    | 17    | 101   | 145   | 44    |       |
| Cr | Size≤0.15mm  | 25% quantile |       |       |       |       |       |       |
|    |              | Median       |       |       |       | 13.51 |       |       |
|    |              | mean         |       |       |       | 13.51 |       |       |
|    |              | 75% quantile |       |       |       |       |       |       |
|    |              | n            |       |       |       | 2     |       |       |
|    | Size0.15~2mm | 25% quantile |       |       |       |       |       |       |
|    |              | Median       |       |       |       |       |       |       |
|    |              | mean         |       |       |       |       |       |       |
|    |              | 75% quantile |       |       |       |       |       |       |
|    |              | n            |       |       |       |       |       |       |
|    | Size≥2mm     | 25% quantile |       |       |       |       | 29.11 |       |
|    |              | Median       | 45.51 |       |       |       | 52.00 |       |
|    |              | mean         | 45.51 |       |       |       | 53.92 | 81.71 |
|    |              | 75% quantile |       |       |       |       | 79.65 |       |
|    |              | n            | 2     |       |       |       | 17    | 1     |
| Cu | Size≤0.15mm  | 25% quantile |       |       |       | 13.09 |       |       |
|    |              | Median       |       |       |       | 20.69 |       |       |
|    |              | mean         | 29.29 |       |       | 23.25 |       |       |
|    |              | 75% quantile |       |       |       | 32.51 |       |       |
|    |              | n            | 1     |       |       | 17    |       |       |
|    | Size0.15~2mm | 25% quantile |       |       |       |       |       |       |
|    |              | Median       | 55.53 |       |       |       |       |       |
|    |              | mean         | 55.53 |       |       |       |       |       |
|    |              | 75% quantile |       |       |       |       |       |       |
|    |              | n            | 2     |       |       |       |       |       |
|    | Size≥2mm     | 25% quantile | 20.00 | 16.00 | 7.73  | 9.75  | 23.23 | 19.74 |
|    |              | Median       | 86.44 | 32.57 | 16.27 | 16.15 | 43.11 | 42.24 |
|    |              | mean         | 64.32 | 37.32 | 27.86 | 19.51 | 42.95 | 46.89 |
|    |              | 75%          | 95.01 | 60.93 | 46.16 | 29.25 | 62.53 | 85.00 |
|    |              | n            | 1     | 1     | 1     | 1     | 1     | 1     |

|    |                    |              |       |       |       |       |       |       |
|----|--------------------|--------------|-------|-------|-------|-------|-------|-------|
|    |                    | quantile     |       |       |       |       |       |       |
|    |                    | n            | 12    | 27    | 23    | 21    | 84    | 23    |
| Mn | Size $\leq$ 0.15mm | 25% quantile |       |       |       |       |       |       |
|    |                    | Median       |       |       |       |       |       |       |
|    |                    | mean         |       |       |       |       |       |       |
|    |                    | 75% quantile |       |       |       |       |       |       |
|    |                    | n            |       |       |       |       |       |       |
|    | Size0.15~2mm       | 25% quantile |       |       |       |       |       |       |
|    |                    | Median       |       |       |       |       |       |       |
|    |                    | mean         |       |       |       |       |       |       |
|    |                    | 75% quantile |       |       |       |       |       |       |
|    |                    | n            |       |       |       |       |       |       |
|    | Size $\geq$ 2mm    | 25% quantile |       |       |       |       | 12.09 |       |
|    |                    | Median       |       |       |       |       | 22.42 |       |
|    |                    | mean         |       |       |       | 53.57 | 19.96 |       |
|    |                    | 75% quantile |       |       |       |       | 25.37 |       |
|    |                    | n            |       |       |       | 1     | 3     |       |
| Ni | Size $\leq$ 0.15mm | 25% quantile |       |       |       | 29.33 |       |       |
|    |                    | Median       |       |       |       | 32.00 |       |       |
|    |                    | mean         | 32.00 |       |       | 37.78 |       |       |
|    |                    | 75% quantile |       |       |       | 52.00 |       |       |
|    |                    | n            | 1     |       |       | 3     |       |       |
|    | Size0.15~2mm       | 25% quantile |       |       |       |       |       |       |
|    |                    | Median       |       |       |       |       |       |       |
|    |                    | mean         | 67.62 |       |       |       |       |       |
|    |                    | 75% quantile |       |       |       |       |       |       |
|    |                    | n            | 1     |       |       |       |       |       |
|    | Size $\geq$ 2mm    | 25% quantile | 32.03 | 0.67  | 12.18 | 39.53 | 18.68 | 48.00 |
|    |                    | Median       | 55.91 | 1.83  | 14.54 | 48.84 | 30.62 | 67.8  |
|    |                    | mean         | 51.21 | 2.98  | 19.57 | 46.10 | 34.41 | 69.18 |
|    |                    | 75% quantile | 65.70 | 6.43  | 32.00 | 60.47 | 56.77 | 96.3  |
|    |                    | n            | 4     | 4     | 4     | 7     | 7     | 11    |
| Pb | Size $\leq$ 0.15mm | 25% quantile |       | 98.74 |       | 5.67  |       |       |
|    |                    | Median       |       | 99.41 |       | 10.31 |       |       |
|    |                    | mean         | 15.53 | 98.95 |       | 15.26 |       |       |
|    |                    | 75% quantile |       | 99.67 |       | 16.67 |       |       |
|    |                    | n            | 1     | 25    |       | 29    |       |       |
|    | Size0.15~2mm       | 25% quantile | 88.44 |       |       |       |       | 32.40 |
|    |                    | Median       | 98.13 |       |       |       |       | 85.37 |
|    |                    | mean         | 92.82 | 43.3  |       |       |       | 68.81 |
|    |                    | 75%          | 99.63 |       |       |       |       | 98.71 |
|    |                    | n            | 1     | 1     |       |       |       | 1     |

|    |                    |              |       |       |       |       |       |       |
|----|--------------------|--------------|-------|-------|-------|-------|-------|-------|
|    |                    | quantile     |       |       |       |       |       |       |
|    |                    | n            | 10    | 1     |       |       |       | 15    |
|    | Size $\geq$ 2mm    | 25% quantile | 15.61 | 33.55 | 11.47 | 14.53 | 14.63 | 23.55 |
|    |                    | Median       | 49.33 | 62.00 | 18.46 | 27.52 | 28.81 | 58.20 |
|    |                    | mean         | 52.98 | 57.41 | 20.00 | 34.25 | 35.37 | 56.93 |
|    |                    | 75% quantile | 97.80 | 82.97 | 29.33 | 55.62 | 50.51 | 91.24 |
| n  |                    | 121          | 73    | 32    | 50    | 91    | 67    |       |
| Sb | Size $\leq$ 0.15mm | 25% quantile |       |       |       |       |       |       |
|    |                    | Median       |       |       |       |       |       |       |
|    |                    | mean         |       |       |       |       |       |       |
|    |                    | 75% quantile |       |       |       |       |       |       |
|    |                    | n            |       |       |       |       |       |       |
|    | Size0.15~2mm       | 25% quantile |       |       |       |       |       |       |
|    |                    | Median       |       |       |       |       |       |       |
|    |                    | mean         |       |       |       |       |       |       |
|    |                    | 75% quantile |       |       |       |       |       |       |
|    |                    | n            |       |       |       |       |       |       |
|    | Size $\geq$ 2mm    | 25% quantile |       |       |       |       | 9.64  |       |
|    |                    | Median       | 0     |       |       |       | 18.07 | 12.65 |
|    |                    | mean         | 0     |       |       |       | 20.02 | 12.65 |
|    |                    | 75% quantile |       |       |       |       | 32.35 |       |
|    |                    | n            | 1     |       |       |       | 3     | 2     |
| Zn | Size $\leq$ 0.15mm | 25% quantile |       |       |       | 16.07 |       |       |
|    |                    | Median       |       |       |       | 19.63 |       |       |
|    |                    | mean         | 38.17 |       |       | 25.95 |       |       |
|    |                    | 75% quantile |       |       |       | 41.04 |       |       |
|    |                    | n            | 1     |       |       | 17    |       |       |
|    | Size0.15~2mm       | 25% quantile |       |       |       |       |       | 95.76 |
|    |                    | Median       |       |       |       |       |       | 98.17 |
|    |                    | mean         | 46.15 |       |       |       |       | 97.38 |
|    |                    | 75% quantile |       |       |       |       |       | 99.05 |
|    |                    | n            | 1     |       |       |       |       | 8     |
|    | Size $\geq$ 2mm    | 25% quantile | 92.88 | 19.33 | 7.01  | 19.43 | 22.27 | 24.00 |
|    |                    | Median       | 100   | 41.88 | 20.60 | 31.04 | 51.37 | 40.87 |
|    |                    | mean         | 95.02 | 43.50 | 20.90 | 41.04 | 53.04 | 40.90 |
|    |                    | 75% quantile | 100   | 70.71 | 37.42 | 65.74 | 83.20 | 59.00 |
|    |                    | n            | 15    | 20    | 11    | 17    | 47    | 11    |

Supplementary Table.S1-2 Heavy metal unit stabilisation efficiency of different material after different particle size separation

|    |                  |              | Unit stabilisation efficiency (%/%) |           |                |              |         |       |
|----|------------------|--------------|-------------------------------------|-----------|----------------|--------------|---------|-------|
|    |                  |              | Calcium salt                        | Phosphate | Organic matter | Clay mineral | Biochar | Other |
| As | Size≤0.15m<br>m  | 25% quantile |                                     |           |                |              |         |       |
|    |                  | Median       |                                     |           |                |              |         |       |
|    |                  | mean         |                                     |           |                | 74.23        |         |       |
|    |                  | 75% quantile |                                     |           |                |              |         |       |
|    |                  | n            |                                     |           |                | 1            |         |       |
|    | Size0.15~2m<br>m | 25% quantile |                                     |           |                |              |         |       |
|    |                  | Median       |                                     |           |                |              |         |       |
|    |                  | mean         |                                     | 13.25     |                |              |         | 1.08  |
|    |                  | 75% quantile |                                     |           |                |              |         |       |
|    |                  | n            |                                     | 1         |                |              |         | 1     |
|    | Size≥2mm         | 25% quantile | 2.47                                |           | 8.45           | 13.85        | 0.39    | 14.7  |
|    |                  | Median       | 4.99                                |           | 18.59          | 22.96        | 2.10    | 23.3  |
|    |                  | mean         | 6.56                                |           | 19.57          | 25.37        | 2.97    | 26.0  |
|    |                  | 75% quantile | 7.99                                |           | 31.18          | 31.76        | 5.96    | 38.1  |
|    |                  | n            | 23                                  |           | 5              | 20           | 14      | 12    |
| Cd | Size≤0.15m<br>m  | 25% quantile |                                     |           |                | 10.93        |         |       |
|    |                  | Median       |                                     |           |                | 18.84        |         |       |
|    |                  | mean         | 20.29                               |           |                | 28.28        |         |       |
|    |                  | 75% quantile |                                     |           |                | 39.34        |         |       |
|    |                  | n            | 1                                   |           |                | 6            |         |       |
|    | Size0.15~2m<br>m | 25% quantile | 5.96                                |           | 48.33          | 10.83        |         | 2.66  |
|    |                  | Median       | 6.89                                |           | 50.00          | 48.03        |         | 2.92  |
|    |                  | mean         | 7.06                                | 11.50     | 59.46          | 37.54        |         | 4.38  |
|    |                  | 75% quantile | 8.19                                |           | 80.20          | 53.75        |         | 6.83  |
|    |                  | n            | 9                                   | 1         | 6              | 3            |         | 5     |
|    | Size≥2mm         | 25% quantile | 5.89                                | 6.38      | 16.18          | 5.40         | 6.45    | 6.20  |
|    |                  | Median       | 11.88                               | 12.46     | 29.79          | 13.33        | 11.00   | 14.76 |
|    |                  | mean         | 23.91                               | 30.89     | 38.25          | 24.88        | 14.61   | 27.91 |
|    |                  | 75% quantile | 20.53                               | 30.03     | 51.89          | 37.95        | 16.14   | 38.56 |
|    |                  | n            | 90                                  | 45        | 10             | 101          | 145     | 44    |
| Cr | Size≤0.15m<br>m  | 25% quantile |                                     |           |                |              |         |       |
|    |                  | Median       |                                     |           |                |              |         |       |
|    |                  | mean         |                                     |           |                |              |         |       |

|              |              |              |              |       |       |        |       |       |   |
|--------------|--------------|--------------|--------------|-------|-------|--------|-------|-------|---|
|              | Size0.15~2mm | 75% quantile |              |       |       |        |       |       |   |
|              |              | n            |              |       |       |        |       |       |   |
|              |              | 25% quantile |              |       |       |        |       |       |   |
|              |              | Median       |              |       |       | 4.50   |       |       |   |
|              |              | mean         |              |       |       | 4.50   |       |       |   |
|              | Size≥2mm     | 75% quantile |              |       |       |        |       |       |   |
|              |              | n            |              |       |       | 2      |       |       |   |
|              |              | 25% quantile |              |       |       |        | 8.64  |       |   |
|              |              | Median       | 22.38        |       |       |        | 14.45 |       |   |
|              |              | mean         | 22.38        |       |       |        | 18.63 | 40.86 |   |
|              | Cu           | Size≤0.15mm  | 75% quantile |       |       |        |       |       |   |
|              |              |              | n            | 2     |       |        |       | 17    | 1 |
|              |              |              | 25% quantile |       |       |        | 4.96  |       |   |
|              |              |              | Median       |       |       |        | 7.82  |       |   |
|              |              |              | mean         | 9.76  |       |        | 9.62  |       |   |
| Size0.15~2mm |              | 75% quantile |              |       |       | 11.66  |       |       |   |
|              |              | n            | 1            |       |       | 17     |       |       |   |
|              |              | 25% quantile |              |       |       |        |       |       |   |
|              |              | Median       | 11.11        |       |       |        |       |       |   |
|              |              | mean         | 11.11        |       |       |        |       |       |   |
| Size≥2mm     |              | 75% quantile |              |       |       |        |       |       |   |
|              |              | n            | 2            |       |       |        |       |       |   |
|              |              | 25% quantile | 3.74         | 6.92  | 7.31  | 5.81   | 7.19  | 10.26 |   |
|              |              | Median       | 8.92         | 12.31 | 9.47  | 8.00   | 11.31 | 19.73 |   |
|              |              | mean         | 20.73        | 42.60 | 10.32 | 9.99   | 24.13 | 44.63 |   |
| Mn           | Size≤0.15mm  | 75% quantile | 15.47        | 38.15 | 12.26 | 9.59   | 15.70 | 54.76 |   |
|              |              | n            | 12           | 27    | 23    | 21     | 84    | 23    |   |
|              |              | 25% quantile |              |       |       |        |       |       |   |
|              |              | Median       |              |       |       |        |       |       |   |
|              |              | mean         |              |       |       |        |       |       |   |
|              | Size0.15~2mm | 75% quantile |              |       |       |        |       |       |   |
|              |              | n            |              |       |       |        |       |       |   |
|              |              | 25% quantile |              |       |       |        |       |       |   |
|              |              | Median       |              |       |       |        |       |       |   |
|              |              | mean         |              |       |       |        |       |       |   |
|              | Size≥2mm     | 25% quantile |              |       |       |        | 4.23  |       |   |
|              |              | Median       |              |       |       |        | 5.60  |       |   |
|              |              | mean         |              |       |       | 133.93 | 5.29  |       |   |

|      |                        |              |       |       |       |       |       |       |  |
|------|------------------------|--------------|-------|-------|-------|-------|-------|-------|--|
|      |                        | 75% quantile |       |       |       |       | 6.04  |       |  |
|      |                        | n            |       |       |       | 1     | 3     |       |  |
| Ni   | Size $\leq$ 0.15m<br>m | 25% quantile |       |       |       | 9.78  |       |       |  |
|      |                        | Median       |       |       |       | 10.67 |       |       |  |
|      |                        | mean         | 10.67 |       |       | 12.59 |       |       |  |
|      |                        | 75% quantile |       |       |       | 17.33 |       |       |  |
|      |                        | n            | 1     |       |       | 3     |       |       |  |
|      | Size0.15~2m<br>m       | 25% quantile |       |       |       |       |       |       |  |
|      |                        | Median       |       |       |       |       |       |       |  |
|      |                        | mean         | 13.52 |       |       |       |       |       |  |
|      |                        | 75% quantile |       |       |       |       |       |       |  |
|      |                        | n            | 1     |       |       |       |       |       |  |
|      | Size $\geq$ 2mm        | 25% quantile | 11.08 | 0.40  | 3.69  | 10.23 | 7.42  | 17.30 |  |
|      |                        | Median       | 16.82 | 1.18  | 8.57  | 16.28 | 11.35 | 47.38 |  |
|      |                        | mean         | 17.37 | 1.90  | 9.75  | 18.15 | 10.53 | 59.17 |  |
|      |                        | 75% quantile | 24.22 | 4.15  | 16.98 | 24.13 | 11.76 | 97.31 |  |
|      |                        | n            | 4     | 4     | 4     | 7     | 7     | 11    |  |
| Pb   | Size $\leq$ 0.15m<br>m | 25% quantile |       | 24.82 |       | 5.67  |       |       |  |
|      |                        | Median       |       | 33.22 |       | 10.31 |       |       |  |
|      |                        | mean         | 5.18  | 44.99 |       | 15.26 |       |       |  |
|      |                        | 75% quantile |       | 49.67 |       | 16.67 |       |       |  |
|      |                        | n            | 1     | 25    |       | 29    |       |       |  |
|      | Size0.15~2m<br>m       | 25% quantile | 7.64  |       |       |       |       | 3.27  |  |
|      |                        | Median       | 11.54 |       |       |       |       | 3.30  |  |
|      |                        | mean         | 13.35 | 10.83 |       |       |       | 35.61 |  |
|      |                        | 75% quantile | 18.46 |       |       |       |       | 32.40 |  |
|      |                        | n            | 10    | 1     |       |       |       | 15    |  |
|      | Size $\geq$ 2mm        | 25% quantile | 4.59  | 9.95  | 4.50  | 4.73  | 7.20  | 10.31 |  |
|      |                        | Median       | 10    | 19.78 | 8.10  | 8.78  | 13.33 | 17.83 |  |
|      |                        | mean         | 13.77 | 38.47 | 13.81 | 13.84 | 17.77 | 20.61 |  |
|      |                        | 75% quantile | 19.81 | 37.58 | 14.95 | 22.15 | 24.39 | 21.39 |  |
|      |                        | n            | 121   | 73    | 32    | 50    | 91    | 67    |  |
| Sb   | Size $\leq$ 0.15m<br>m | 25% quantile |       |       |       |       |       |       |  |
|      |                        | Median       |       |       |       |       |       |       |  |
|      |                        | mean         |       |       |       |       |       |       |  |
|      |                        | 75% quantile |       |       |       |       |       |       |  |
|      |                        | n            |       |       |       |       |       |       |  |
|      | Size0.15~2m<br>m       | 25% quantile |       |       |       |       |       |       |  |
|      |                        | Median       |       |       |       |       |       |       |  |
| mean |                        |              |       |       |       |       |       |       |  |

|    |                    |              |       |       |       |       |       |        |
|----|--------------------|--------------|-------|-------|-------|-------|-------|--------|
|    | Size $\geq$ 2mm    | 75% quantile |       |       |       |       |       |        |
|    |                    | n            |       |       |       |       |       |        |
|    |                    | 25% quantile |       |       |       |       | 1.92  |        |
|    |                    | Median       | 0     |       |       |       | 3.61  |        |
|    |                    | mean         | 0     |       |       |       | 4.00  | 126.51 |
|    |                    | 75% quantile |       |       |       |       | 6.47  | 126.51 |
|    |                    | n            | 1     |       |       | 3     | 2     |        |
| Zn | Size $\leq$ 0.15mm | 25% quantile |       |       |       | 4.44  |       |        |
|    |                    | Median       |       |       |       | 9.38  |       |        |
|    |                    | mean         | 12.72 |       |       | 9.88  |       |        |
|    |                    | 75% quantile |       |       |       | 16.03 |       |        |
|    |                    | n            | 1     |       |       | 17    |       |        |
|    | Size 0.15~2mm      | 25% quantile |       |       |       |       |       | 1.57   |
|    |                    | Median       |       |       |       |       |       | 1.63   |
|    |                    | mean         | 9.23  |       |       |       |       | 2.23   |
|    |                    | 75% quantile |       |       |       |       |       | 3.30   |
|    |                    | n            | 1     |       |       |       |       | 8      |
|    | Size $\geq$ 2mm    | 25% quantile | 10.00 | 7.62  | 1.75  | 4.44  | 7.37  | 2.90   |
|    |                    | Median       | 18.58 | 12.84 | 4.12  | 10.19 | 16.40 | 3.81   |
|    |                    | mean         | 19.30 | 11.63 | 11.74 | 16.46 | 20.67 | 8.46   |
|    |                    | 75% quantile | 35.77 | 15.31 | 19.64 | 22.46 | 22.60 | 6.18   |
|    |                    | n            | 15    | 20    | 11    | 17    | 47    | 11     |

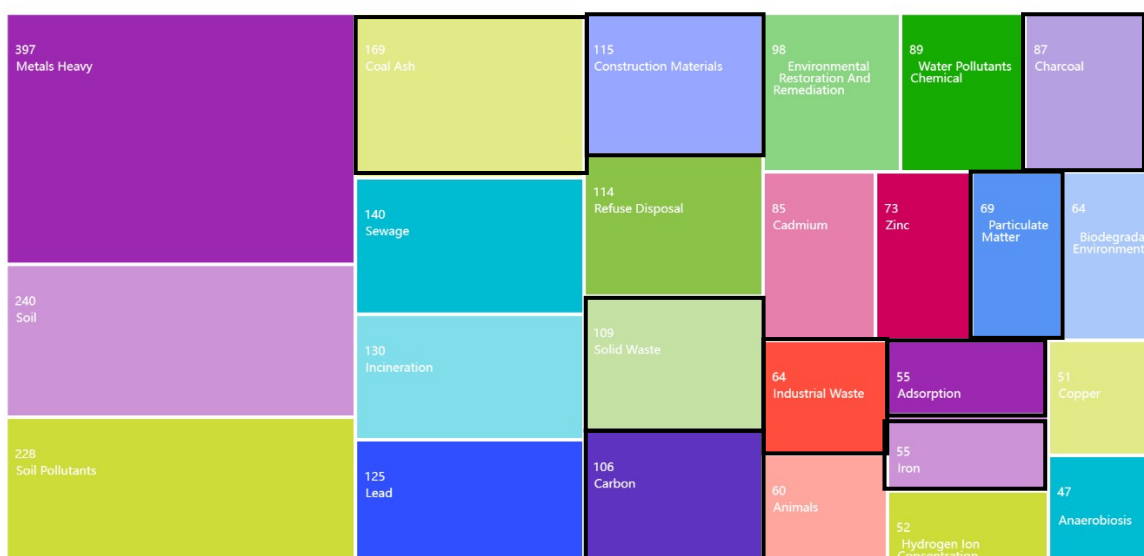

Supplementary Figure S1: Statistics of hot words on heavy metal stabilisation from 2008 to 2024. TS = (heavy metal AND Stabilisation AND material).
